# Supplementary material for: Cancer mortality after low dose exposure to ionising radiation in workers in France, the United Kingdom, and the United States (INWORKS): cohort study
Source: PubMed Central journal article supplement — BMJ. 2023 Aug 16;382:e074520. doi: 10.1136/bmj-2022-074520 (PMC10427997; doi:10.1136/bmj-2022-074520), 2023-08-16

## Web Extra

Title: Cancer mortality after low dose exposure to ionizing radiation: a cohort study of workers in France, the United Kingdom, and the United States (INWORKS)

David B. Richardson (<https://orcid.org/0000-0001-8550-0212>), professor<sup>1</sup>, Klervi Leuraud, head of service<sup>2</sup>, Dominique Laurier, deputy director<sup>2</sup>, Michael Gillies, senior research scientist<sup>3</sup>, Richard Haylock, senior research scientist<sup>3</sup>, Kaitlin Kelly-Reif, senior research scientist<sup>4</sup>, Stephen Bertke, senior research scientist<sup>4</sup>, Robert D. Daniels, senior research scientist<sup>4</sup>, Isabelle Thierry-Chef, senior research scientist<sup>5</sup>, Monika Moissonnier, research assistant<sup>6</sup>, Ausrele Kesminiene, senior visiting scientist<sup>6</sup>, and Mary K. Schubauer-Berigan, programme head<sup>6</sup>

### Affiliations

1. Department of Environmental and Occupational Health, Program in Public Health, University of California, Irvine, CA, USA 92697.
2. Institut de Radioprotection et de Sûreté Nucléaire (IRSN), Fontenay-aux-Roses, France.
3. UK Health Security Agency, Chilton, Didcot, Oxfordshire OX110RQ, UK.
4. National Institute for Occupational Safety and Health, Cincinnati, Ohio, USA.
5. Barcelona Institute of Global Health (ISGlobal), Barcelona, Spain.
6. International Agency for Research on Cancer. Lyon, France.

Supplementary table A. Outcome categories and associated codes in revisions 6-10 of the ICD.

| Outcome category | ICD-6   | ICD-7   | ICD-8   | ICD-9                                                   | ICD-10                                                      |
|------------------|---------|---------|---------|---------------------------------------------------------|-------------------------------------------------------------|
| Solid cancer     | 140-199 | 140-199 | 140-199 | 140-199, except 176.5 (Kaposi's sarcoma of lymph nodes) | C00-C80, C97 except C46.3 (Kaposi's sarcoma of lymph nodes) |

**Exclusion of lung cancer, defined as:**

| Outcome category        | ICD-6   | ICD-7                                     | ICD-8 | ICD-9 | ICD-10  |
|-------------------------|---------|-------------------------------------------|-------|-------|---------|
| Lung/ trachea/ bronchus | 162-163 | 162.0-162.1, 162.8, 163 (pleura excluded) | 162   | 162   | C33-C34 |

**Exclusion of smoking-related cancers, defined as:**

| Outcome category              | ICD-6    | ICD-7   | ICD-8       | ICD-9              | ICD-10                  |
|-------------------------------|----------|---------|-------------|--------------------|-------------------------|
| Buccal cavity & pharynx       | 140-148  | 140-148 | 140-149     | 140-149            | C00-C14                 |
| Oesophagus                    | 150      | 150     | 150         | 150                | C15                     |
| Stomach                       | 151      | 151     | 151         | 151                | C16                     |
| Colon (excl. small intestine) | 153      | 153     | 153         | 153                | C18                     |
| Rectum                        | 154      | 154     | 154         | 154.0,154.1, 154.8 | C19-C20                 |
| Liver                         | 155      | 155.0   | 155.0,155.1 | 155                | C22                     |
| Gallbladder                   |          | 155.1   | 156         | 156                | C23, C24                |
| Pancreas                      | 157      | 157     | 157         | 157                | C25                     |
| Nasal cavity                  |          | 160     | 160         | 160                | C30, C31                |
| Larynx                        | 161      | 161     | 161         | 161                | C32                     |
| Lung/ trachea/ bronchus       | as above |         |             |                    |                         |
| Cervix uteri                  |          | 171     | 180         | 180                | C53                     |
| Ovary                         | 175      | 175     | 183         | 183                | C56, C57.0-C57.4, C57.8 |
| Bladder                       | 181      | 181     | 188,189.9   | 188,189.3-189.9    | C67                     |
| Kidney                        | 180      | 180     | 189.0-189.2 | 189.0-189.2        | C64-C66                 |

**Exclusion of cancer of the lung, liver and bone, defined as:**

| Outcome category                     | ICD-6    | ICD-7   | ICD-8         | ICD-9   | ICD-10   |
|--------------------------------------|----------|---------|---------------|---------|----------|
| Lung/ trachea/ bronchus              | as above |         |               |         |          |
| Liver/ gallbladder/ biliary passages | 155-156  | 155-156 | 155-156,197.8 | 155-156 | C22-C24  |
| Bone                                 | 196      | 196     | 170           | 170     | C40, C41 |

**Exclusion of cancer of the lung and pleura, defined as:**

| Outcome category        | ICD-6    | ICD-7 | ICD-8 | ICD-9 | ICD-10                      |
|-------------------------|----------|-------|-------|-------|-----------------------------|
| Lung/ trachea/ bronchus | as above |       |       |       |                             |
| Pleura                  | *        | 162.2 | 163.0 | 163   | C38.4; C45.0 (mesothelioma) |

\*cannot be separated

**Analysis of chronic obstructive pulmonary disease, defined as:**

| Outcome category                      | ICD-6          | ICD-7          | ICD-8   | ICD-9       | ICD-10       |
|---------------------------------------|----------------|----------------|---------|-------------|--------------|
| chronic obstructive pulmonary disease | 501-502, 527.1 | 501-502, 527.1 | 490-492 | 490-492,496 | J40-J43, J44 |

Supplementary table B. Estimates of excess relative rate (ERR) per Gy for death due to specific cancer categories in INWORKS. 5-, 10-, 15-, and 20-year exposure lag assumptions.

| Lag assumption               | Deaths | ERR per Gy <sup>†</sup> | 90% CI       | LRT   | <i>p</i> |
|------------------------------|--------|-------------------------|--------------|-------|----------|
| 5 year                       |        |                         |              |       |          |
| All cancer                   | 31,009 | 0.47                    | 0.25 to 0.70 | 13.04 | <0.001   |
| Solid cancer                 | 28,089 | 0.46                    | 0.23 to 0.70 | 11.45 | 0.001    |
| Solid cancer other than lung | 19,823 | 0.43                    | 0.16 to 0.71 | 7.08  | 0.008    |
| 10 year                      |        |                         |              |       |          |
| All cancer                   | 31,009 | 0.53                    | 0.30 to 0.77 | 15.29 | <0.001   |
| Solid cancer                 | 28,089 | 0.52                    | 0.27 to 0.77 | 13.28 | <0.001   |
| Solid cancer other than lung | 19,823 | 0.46                    | 0.18 to 0.76 | 7.75  | 0.005    |
| 15 year                      |        |                         |              |       |          |
| All cancer                   | 31,009 | 0.57                    | 0.33 to 0.84 | 16.02 | <0.001   |
| Solid cancer                 | 28,089 | 0.55                    | 0.29 to 0.82 | 13.44 | <0.001   |
| Solid cancer other than lung | 19,823 | 0.51                    | 0.21 to 0.82 | 8.23  | 0.004    |
| 20 year                      |        |                         |              |       |          |
| All cancer                   | 31,009 | 0.58                    | 0.32 to 0.87 | 13.93 | <0.001   |
| Solid cancer                 | 28,089 | 0.54                    | 0.26 to 0.83 | 10.84 | 0.001    |
| Solid cancer other than lung | 19,823 | 0.46                    | 0.14 to 0.80 | 5.95  | 0.02     |

*p* is the *p*-value for the reported likelihood ratio test (LRT) statistic and is evaluated under a Chi-square distribution with 1 degree of freedom.

<sup>†</sup>strata: country, age, sex, birth cohort, socioeconomic status, duration employed, neutron monitoring status.

Supplementary table C. Estimates of excess relative rate (ERR) per Gy for death due to solid cancer in INWORKS. Analyses on restricted dose ranges.

| Restricted dose range | Deaths | ERR per Gy <sup>†</sup> | 90% CI        | LRT   | <i>p</i> |
|-----------------------|--------|-------------------------|---------------|-------|----------|
| No restriction        | 28,089 | 0.52                    | 0.27 to 0.77  | 13.28 | <0.001   |
| <400 mGy              | 27,960 | 0.63                    | 0.34 to 0.92  | 13.49 | <0.001   |
| <200 mGy              | 27,429 | 0.97                    | 0.55 to 1.39  | 15.69 | <0.001   |
| <100 mGy              | 26,283 | 1.12                    | 0.45 to 1.80  | 7.82  | 0.005    |
| <50 mGy               | 24,518 | 1.38                    | 0.20 to 2.60  | 3.74  | 0.05     |
| <20 mGy               | 21,293 | 1.30                    | -1.33 to 4.06 | 0.66  | 0.42     |

10 year lag assumption.

*P* is the p-value for the reported likelihood ratio test (LRT) statistic, and is evaluated under a Chi-square distribution with 1 degree of freedom.

<sup>†</sup>strata: country, age, sex, birth cohort, socioeconomic status, duration employed, neutron monitoring status.

Supplementary table D. Estimates of excess relative rate (ERR) per Gy for death due to specific outcome categories in INWORKS. Analyses restricted by year of hire.

| Restricted by year of hire                               | Deaths | ERR per Gy <sup>†</sup> | 90% CI                     | LRT   | <i>p</i> |
|----------------------------------------------------------|--------|-------------------------|----------------------------|-------|----------|
| Hired 1958+ [238,639 workers; 7.87 million person-years] |        |                         |                            |       |          |
| All cancer                                               | 16,361 | 1.12                    | 0.68 to 1.60               | 19.93 | <0.001   |
| Solid cancer                                             | 14,868 | 1.22                    | 0.74 to 1.72               | 20.84 | <0.001   |
| Solid cancer other than lung                             | 10,692 | 1.20                    | 0.65 to 1.78               | 15.12 | <0.001   |
| COPD                                                     | 1,657  | -0.50                   | -1.53 to 0.53 <sup>f</sup> | 0.56  | 0.45     |
| Hired 1965+ [189,386 workers; 5.89 million person-years] |        |                         |                            |       |          |
| All cancer                                               | 8,918  | 1.23                    | 0.49 to 2.04               | 8.14  | 0.004    |
| Solid cancer                                             | 8,119  | 1.44                    | 0.65 to 2.32               | 9.79  | 0.002    |
| Solid cancer other than lung                             | 5,842  | 1.38                    | 0.47 to 2.39               | 6.78  | 0.009    |
| COPD                                                     | 837    | 0.24                    | -2.05 to 2.53 <sup>f</sup> | 0.03  | 0.86     |

10 year lag assumption.

COPD, Chronic obstructive pulmonary disease.

<sup>f</sup> Wald-type confidence interval

*p* is the *p*-value for the reported likelihood ratio test (LRT) statistic and is evaluated under a Chi-square distribution with 1 degree of freedom.

<sup>†</sup>strata: country, age, sex, birth cohort, socioeconomic status, duration employed, neutron monitoring status.

Supplementary table E. Estimates of excess relative rate (ERR) per Gy for death due to solid cancer within strata of internal monitoring status. 10-year lag assumption.

|                                         | Deaths | ERR per Gy <sup>†</sup> | 90% CI        |
|-----------------------------------------|--------|-------------------------|---------------|
| Internal monitoring status <sup>†</sup> |        |                         |               |
| Flag 1                                  | 23,410 | 0.82                    | 0.46 to 1.22  |
| Flag 2                                  | 4,679  | 0.21                    | -0.11 to 0.56 |

<sup>†</sup>Workers were grouped into two categories. Flag 1: Not flagged for incorporated radionuclides or internal monitoring. Flag 2: flagged for incorporated radionuclides or internal monitoring.

<sup>†</sup>strata: country, age, sex, birth cohort, socioeconomic status, duration employed, neutron monitoring status.

Supplementary table F. Estimates of excess relative rate (ERR) per Gy for death due to solid cancer within strata of neutron monitoring status. 10-year lag assumption.

| Neutron monitoring status <sup>†</sup> | Deaths | ERR per Gy <sup>†</sup> | 90% CI        |
|----------------------------------------|--------|-------------------------|---------------|
| Flag 1                                 | 24,213 | 0.55                    | 0.23 to 0.90  |
| Flag 2                                 | 2,468  | 0.49                    | 0.12 to 0.93  |
| Flag 3                                 | 1,408  | 0.36                    | -0.51 to 1.43 |

<sup>†</sup>Workers were grouped into three categories. Flag 1: No positive recorded neutron dose. Flag 2: Positive recorded neutron dose not exceeding 10% of the total equivalent dose for external radiation. Flag 3: Recorded neutron dose exceeding 10% of the total equivalent dose for external radiation.

<sup>†</sup>strata: country, age, sex, birth cohort, socioeconomic status, duration employed, neutron monitoring status.



Supplementary table G. Estimates of excess relative rate (ERR) per Gy for death due to specific cancer categories in INWORKS.

| Previous INWORKS analysis [308,297 workers; 8.2 million person-years] |        |                         |              |
|-----------------------------------------------------------------------|--------|-------------------------|--------------|
|                                                                       | Deaths | ERR per Gy <sup>†</sup> | 90% CI       |
| All cancer                                                            | 19,748 | 0.51                    | 0.23 to 0.82 |
| Solid cancer                                                          | 17,957 | 0.47                    | 0.18 to 0.79 |
| Solid cancer excluding lung                                           | 12,155 | 0.46                    | 0.11 to 0.85 |
| Current INWORKS analysis [309,932 workers; 10.7 million person-years] |        |                         |              |
|                                                                       | Deaths | ERR per Gy <sup>†</sup> | 90% CI       |
| All cancer                                                            | 31,009 | 0.53                    | 0.30 to 0.77 |
| Solid cancer                                                          | 28,089 | 0.52                    | 0.27 to 0.77 |
| Solid cancer excluding lung                                           | 19,823 | 0.46                    | 0.18 to 0.76 |

10 year lag assumption.

CI: confidence interval.

<sup>†</sup>strata: country, age, sex, birth cohort, socioeconomic status, duration employed, neutron monitoring status.

Supplementary table H. Analysis using recorded external doses rather than adjusted estimates of colon dose. Estimates of excess relative rate (ERR) per Gy<sup>†</sup> for death due to cancer, solid cancer and solid cancer other than lung in INWORKS.

|                                   | ERR per Gy <sup>†</sup> | 90% CI       | LRT   | <i>p</i> |
|-----------------------------------|-------------------------|--------------|-------|----------|
| Recorded photon dose, 10-year lag |                         |              |       |          |
| All cancer                        | 0.38                    | 0.22 to 0.55 | 15.24 | <0.001   |
| Solid cancer                      | 0.37                    | 0.19 to 0.55 | 13.02 | <0.001   |
| Solid cancer other than lung      | 0.33                    | 0.13 to 0.55 | 7.59  | 0.006    |

*p* is the p-value for the reported likelihood ratio test (LRT) statistic and is evaluated under a Chi-square distribution with 1 degree of freedom

<sup>†</sup>strata: country, age, sex, birth cohort, socioeconomic status, duration employed, neutron monitoring status.

Supplementary figure A. Directed acyclic graph used to inform covariate adjustment in the relationship between occupational dose due to photon exposure (E) and solid cancer (D).

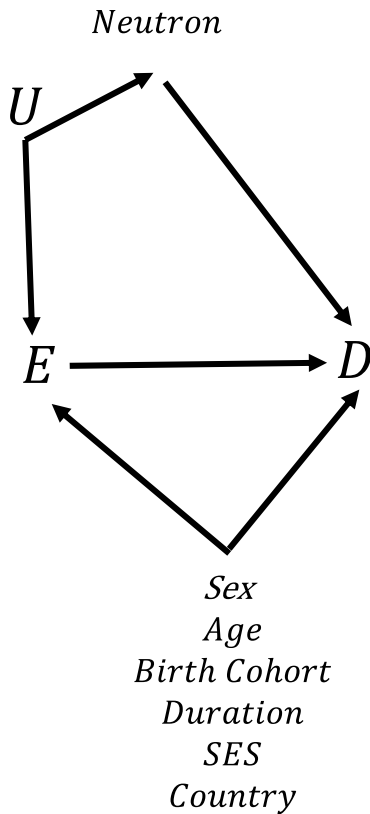

Neutron monitoring status should be adjusted for because neutron exposure may cause cancer and because photon exposure and neutron monitoring may be associated due to a common cause, U (e.g., employment area and task assignment). Sex should be adjusted for because male and female workers have different baseline cancer rates and tend to differ in occupational radiation exposure (e.g., due to gender segregation in employment and task assignment). Age, birth cohort, and duration of employment or radiation work should be adjusted for because these are related to baseline cancer rates and to cumulative occupational radiation exposure (e.g., due to changes and accrual over time of exposure). Socioeconomic status (SES) should be adjusted for because white-collar and blue-collar workers have different baseline cancer rates and tend to differ in occupational radiation exposure (e.g., due to employment and task assignment). Country should be adjusted for because countries have different baseline cancer rates and differ in occupational radiation exposure.

Supplementary figure B. Relative rate of mortality due to solid cancer other than lung by categories of cumulative colon dose, lagged 10 years in INWORKS. Grey lines indicate 90% confidence intervals, and the dashed line depicts the fitted linear model for the change in the excess relative rate of mortality due to solid cancer other than lung with dose.

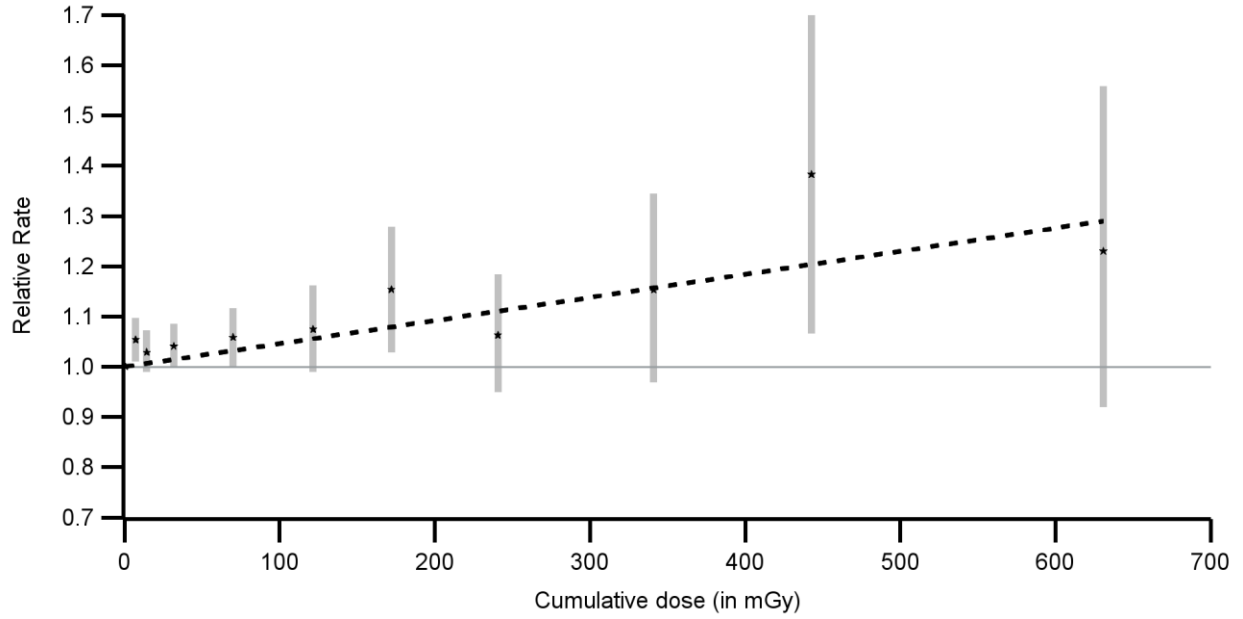

Supplement: ricd074520.ww1.pdf [file ricd074520.ww1.pdf]
